# Supplementary material for: Prognostic role of BNP in children undergoing surgery for congenital heart disease: analysis of prediction models incorporating standard risk factors
Source: publisher site journal article supplement (doi:10.1515/cclm-2014-1084), 2015-01-01
Supplement: Supplementary file 1 [file cclm-2014-1084_suppl.docx]

DOI: [10.1515/cclm-2014-1084](http://dx.doi.org/10.1515/cclm-2014-0482)

Supplemental Figure: Calibration plot of the model with traditional risk factors and BNP peak.
